# Supplementary figures and images for: A single, continuous metric to define tiered serum neutralization potency against HIV
Source: eLife journal article supplement (doi:10.7554/elife.31805), 2018-01-19

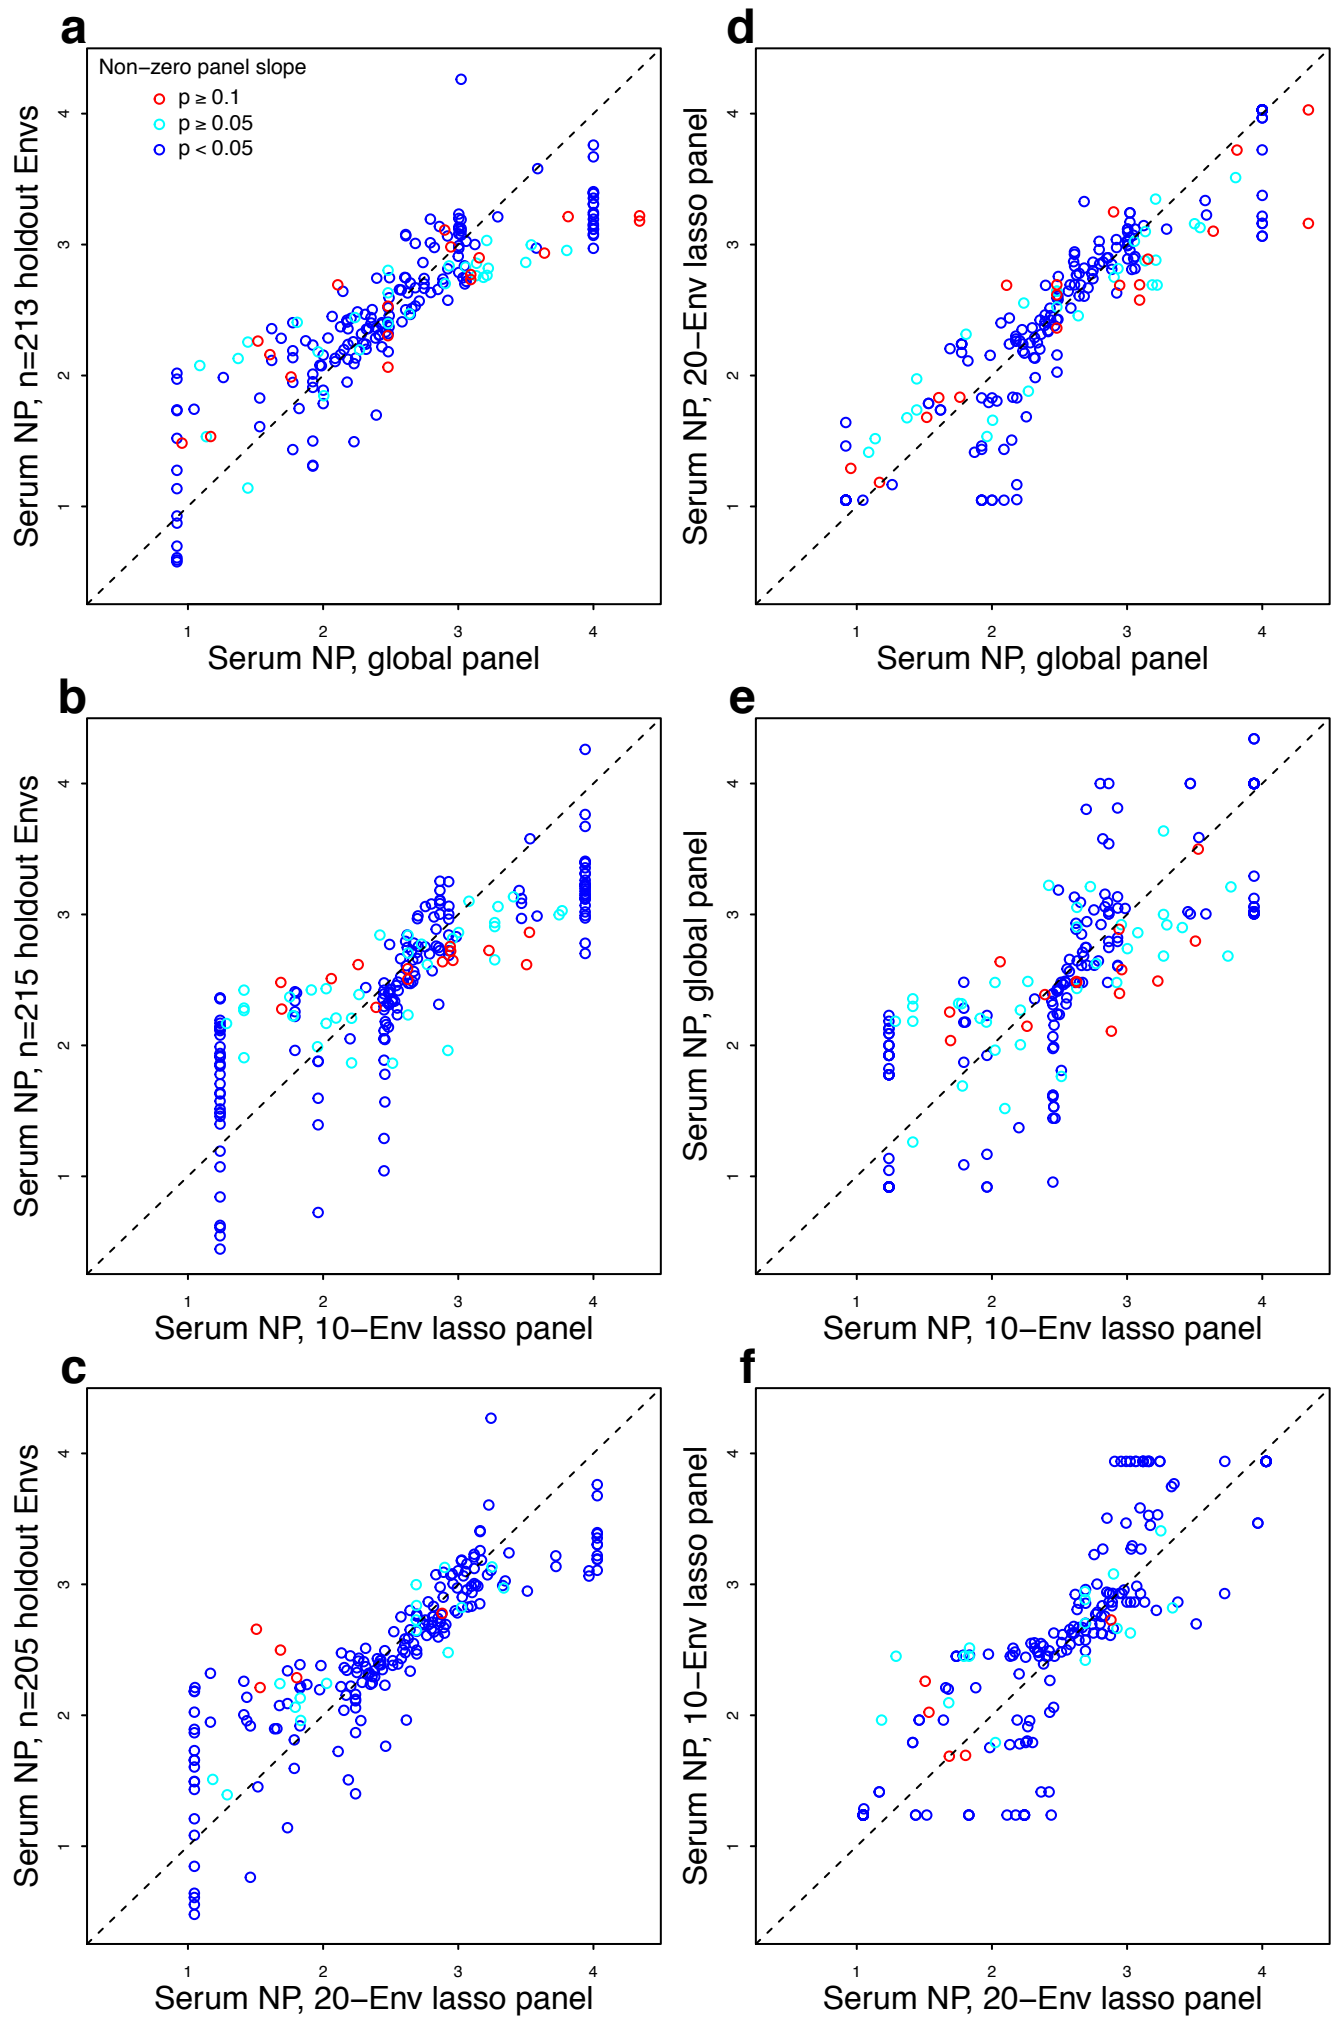

Figure 4-figure supplement 2

Supplement: supp [file elife-31805-supp-v1.zip]

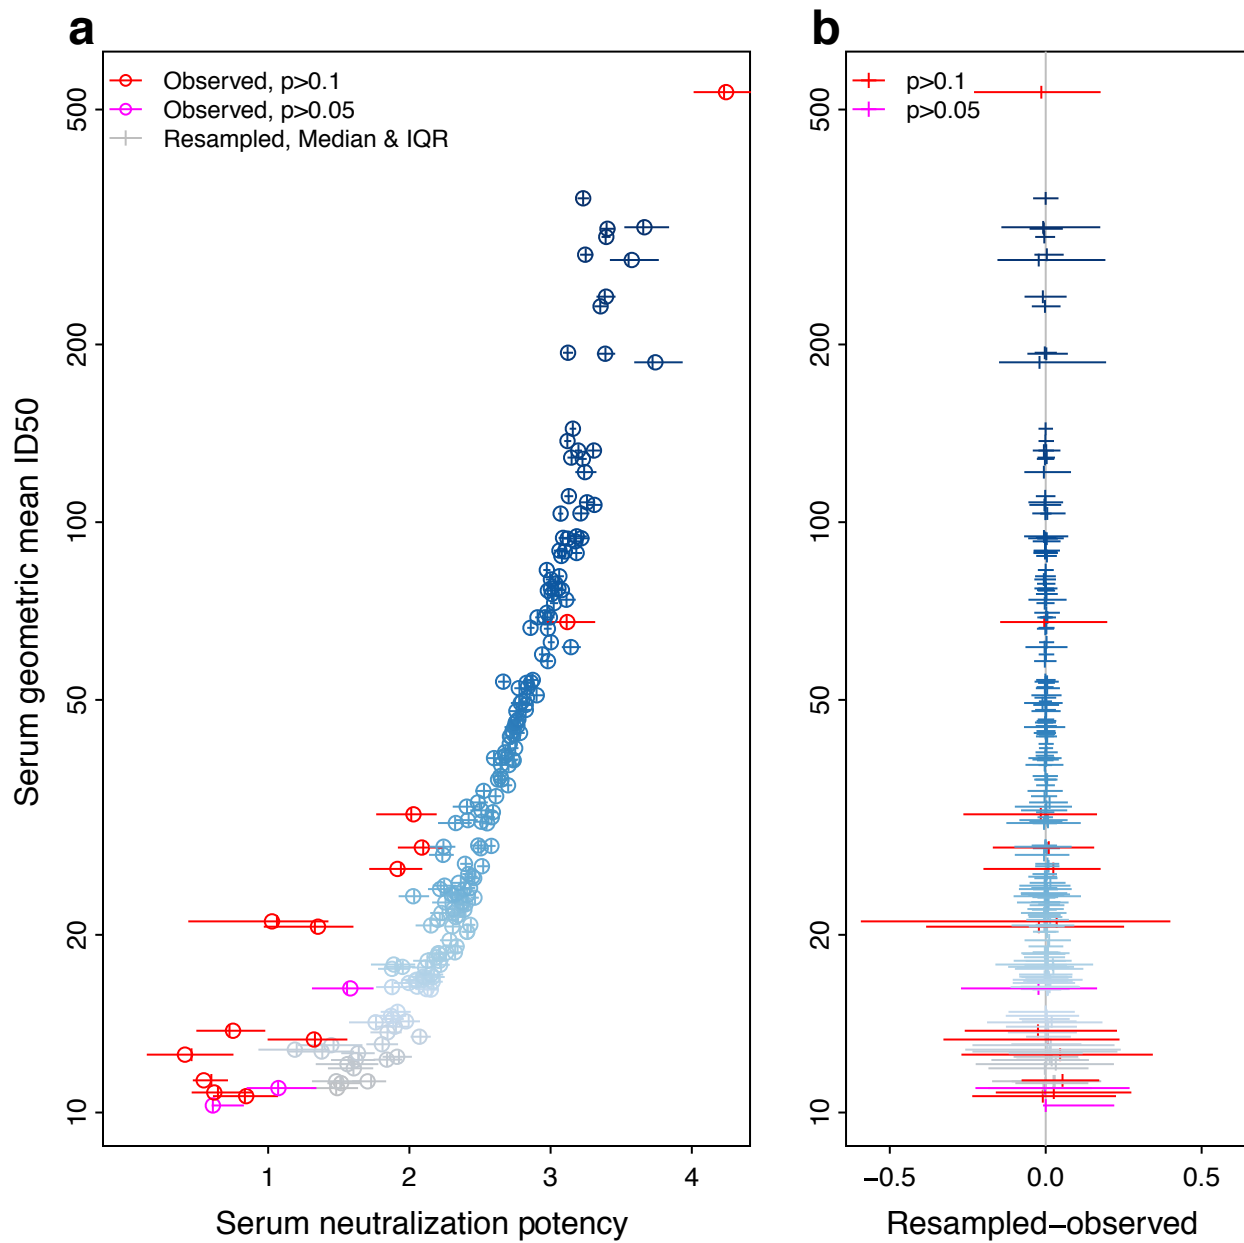

Figure 2-figure supplement 1

Supplement: supp [file elife-31805-supp-v1.zip]

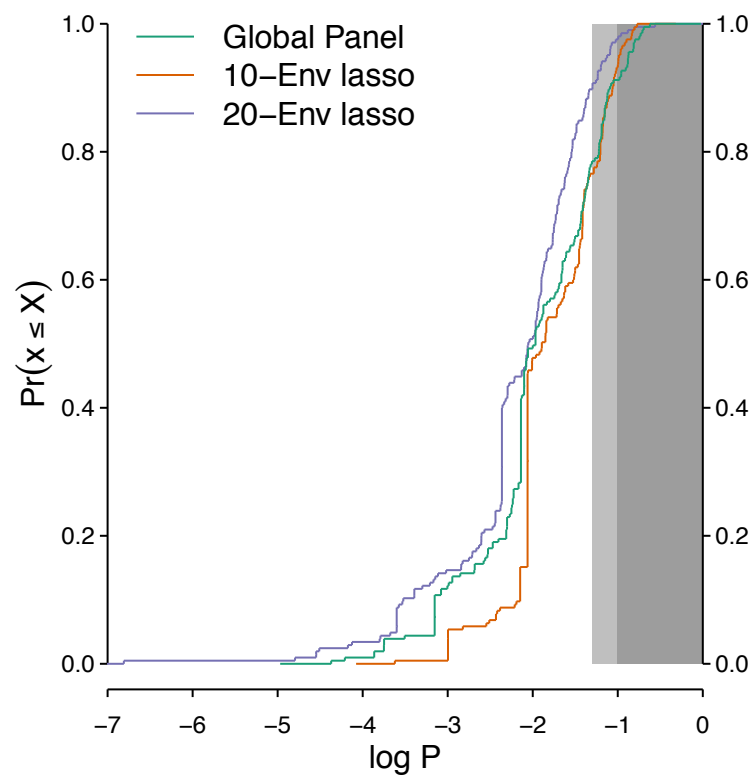

Figure 4-figure supplement 3

Supplement: supp [file elife-31805-supp-v1.zip]

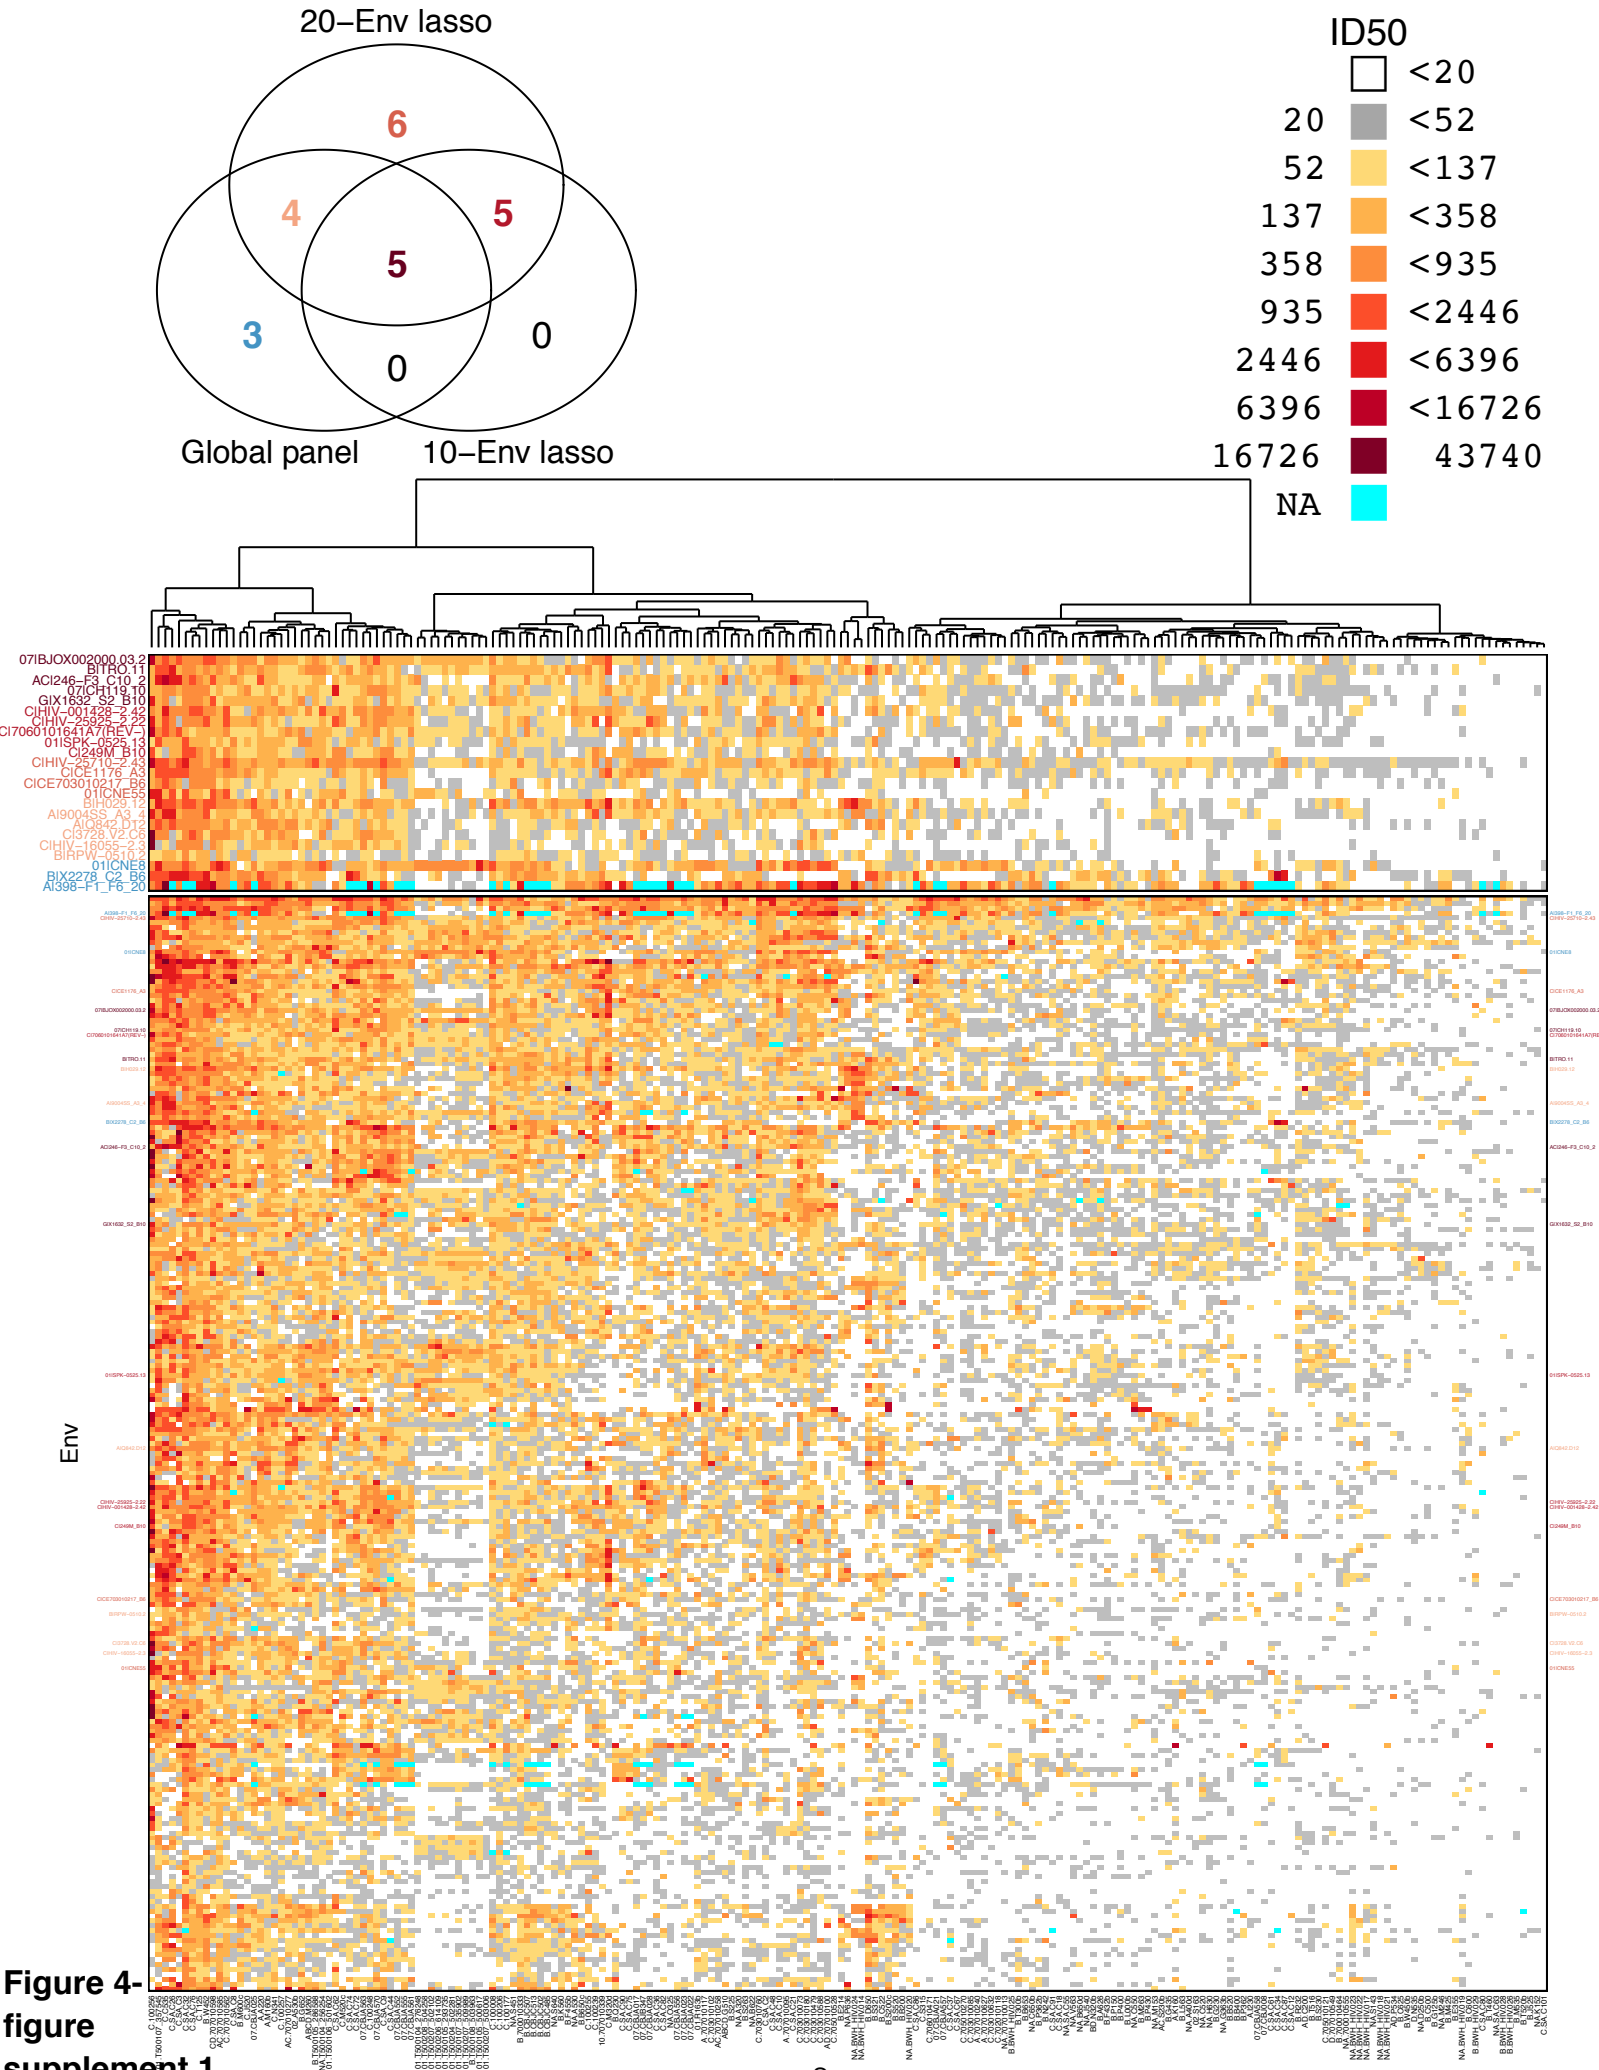

Supplement: supp [file elife-31805-supp-v1.zip]
